# Supplementary material for: From multiplex serology to serolomics – a novel approach to the antibody response against the SARS-CoV-2 proteome
Source: bioRxiv or medRxiv preprint supplement (doi:10.1101/2020.10.19.20214916), 2020-10-20
Supplement: Supplementary file [file media-1.pdf]

# From multiplex serology to serolomics – a novel approach to the antibody response against the SARS-CoV-2 proteome

## Authors:

Julia Butt<sup>1</sup>, Rajagopal Murugan<sup>2</sup>, Theresa Hippchen<sup>3</sup>, Sylvia Olberg<sup>4,5</sup>, Monique van Straaten<sup>6</sup>, Hedda Wardemann<sup>2</sup>, Erec Stebbins<sup>6</sup>, Hans-Georg Kräusslich<sup>4,5</sup>, Ralf Bartenschlager<sup>5,7,8</sup>, Hermann Brenner<sup>9,10</sup>, Vibor Laketa<sup>4,5</sup>, Ben Schöttker<sup>9,10</sup>, Barbara Müller<sup>4</sup>, Uta Merle<sup>3</sup>, Tim Waterboer<sup>1\*</sup>

## Affiliations:

<sup>1</sup>Infections and Cancer Epidemiology, German Cancer Research Center (Deutsches Krebsforschungszentrum, DKFZ), Heidelberg, Germany

<sup>2</sup>B Cell Immunology, German Cancer Research Center (Deutsches Krebsforschungszentrum, DKFZ), Heidelberg, Germany

<sup>3</sup>Department of Internal Medicine IV, University Hospital Heidelberg, Heidelberg, Germany

<sup>4</sup>Department of Infectious Diseases, Virology, University Hospital Heidelberg, Heidelberg, Germany

<sup>5</sup>German Center for Infection Research (DZIF), Heidelberg partner site, Heidelberg, Germany

<sup>6</sup> Division of Structural Biology of Infection and Immunity, German Cancer Research Center (Deutsches Krebsforschungszentrum, DKFZ), Heidelberg, Germany

<sup>7</sup>Department of Infectious Diseases, Molecular Virology, Heidelberg University, Heidelberg, Germany

<sup>8</sup>Division Virus-Associated Carcinogenesis, German Cancer Research Center (DKFZ), Heidelberg, Germany

<sup>9</sup>Division of Clinical Epidemiology and Aging Research, German Cancer Research Center (Deutsches Krebsforschungszentrum, DKFZ), Heidelberg, Germany

<sup>10</sup>Network Aging Research, University of Heidelberg, Heidelberg, Germany

**\* To whom correspondence should be addressed: [t.waterboer@dkfz-heidelberg.de](mailto:t.waterboer@dkfz-heidelberg.de)**

## Funding:

This work was generously supported by the Dieter Morszeck Stiftung. Data and sample collection for the ESTHER study were supported by a grant from the Baden-Württemberg State Ministry of Science, Research and Arts.

## SUPPLEMENTARY MATERIAL

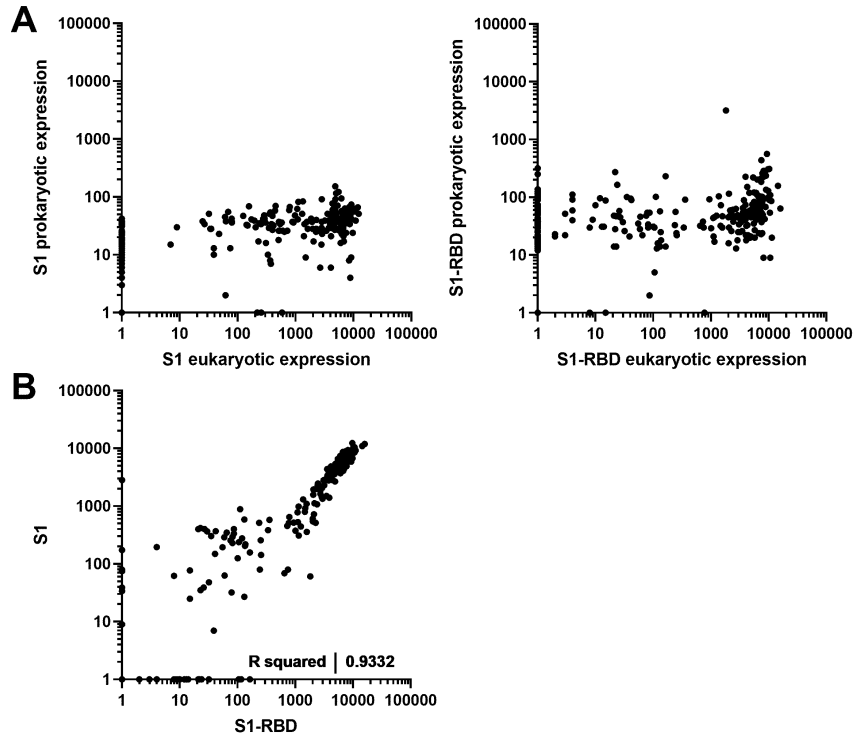

**Supplementary figure S1: Antibody responses to SARS-CoV-2 proteins S1 and S1-RBD in n=174 serum samples of Covid-19 patients and n=85 serum samples of pre-pandemic controls.** A) Comparison of antibody responses (MFI) to S1 and S1-RBD proteins expressed in HEK293 (eukaryotic expression) to those expressed in *E. coli* BL21 (prokaryotic expression); B) Correlation of antibody responses (MFI) to eukaryotically expressed S1 and S1-RBD; the Pearson correlation coefficient (R squared) is given as a measure for correlation.

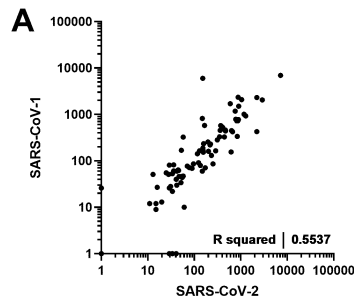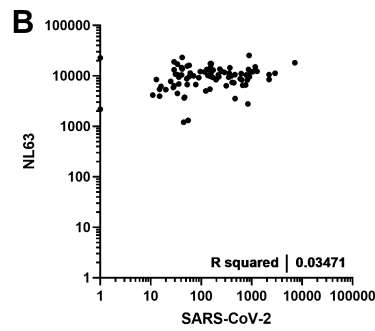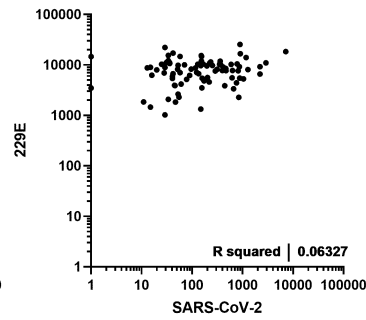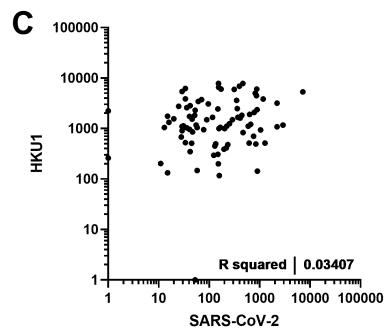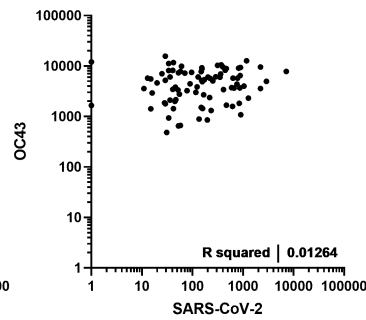

**Supplementary figure S2: Correlation of antibody responses to protein N of SARS-CoV-2 to those of other CoVs.** Antibody responses (MFI) to protein N of SARS-CoV-2 are compared to those of SARS-CoV-1 and ccCoVs: A) SARS-CoV-1, B)  $\alpha$ -CoVs NL63 and 229E, and c)  $\beta$ -CoVs OC43 and HKU1. Blood samples were drawn prior to the Covid-19 pandemic (n=85). The Pearson correlation coefficient (R squared) is given as a measure for correlation.

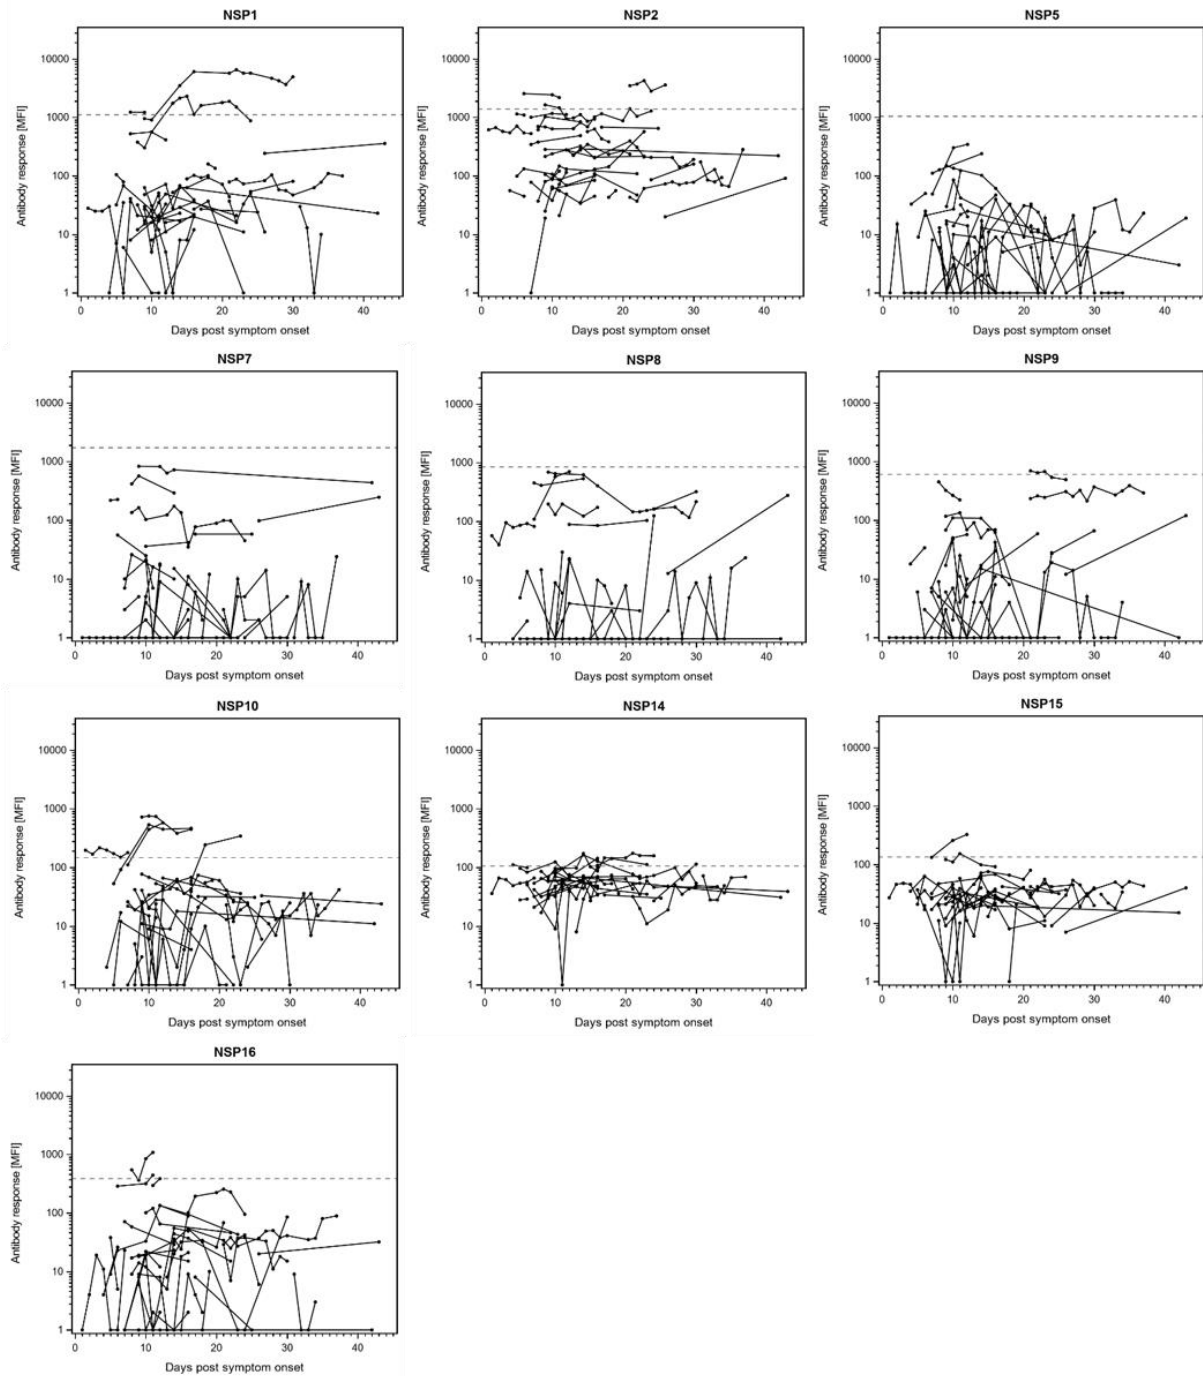

**Supplementary figure S3a: Antibody responses (IgM/IgA/IgG) to SARS-CoV-2 non-structural proteins in longitudinal samples of n=32 hospitalized Covid-19 patients.** The antibody response (MFI) is plotted against days post symptom onset. The dashed line indicates the antigen-specific cut-off defined as mean plus three times standard deviation in n=85 pre-pandemic controls.

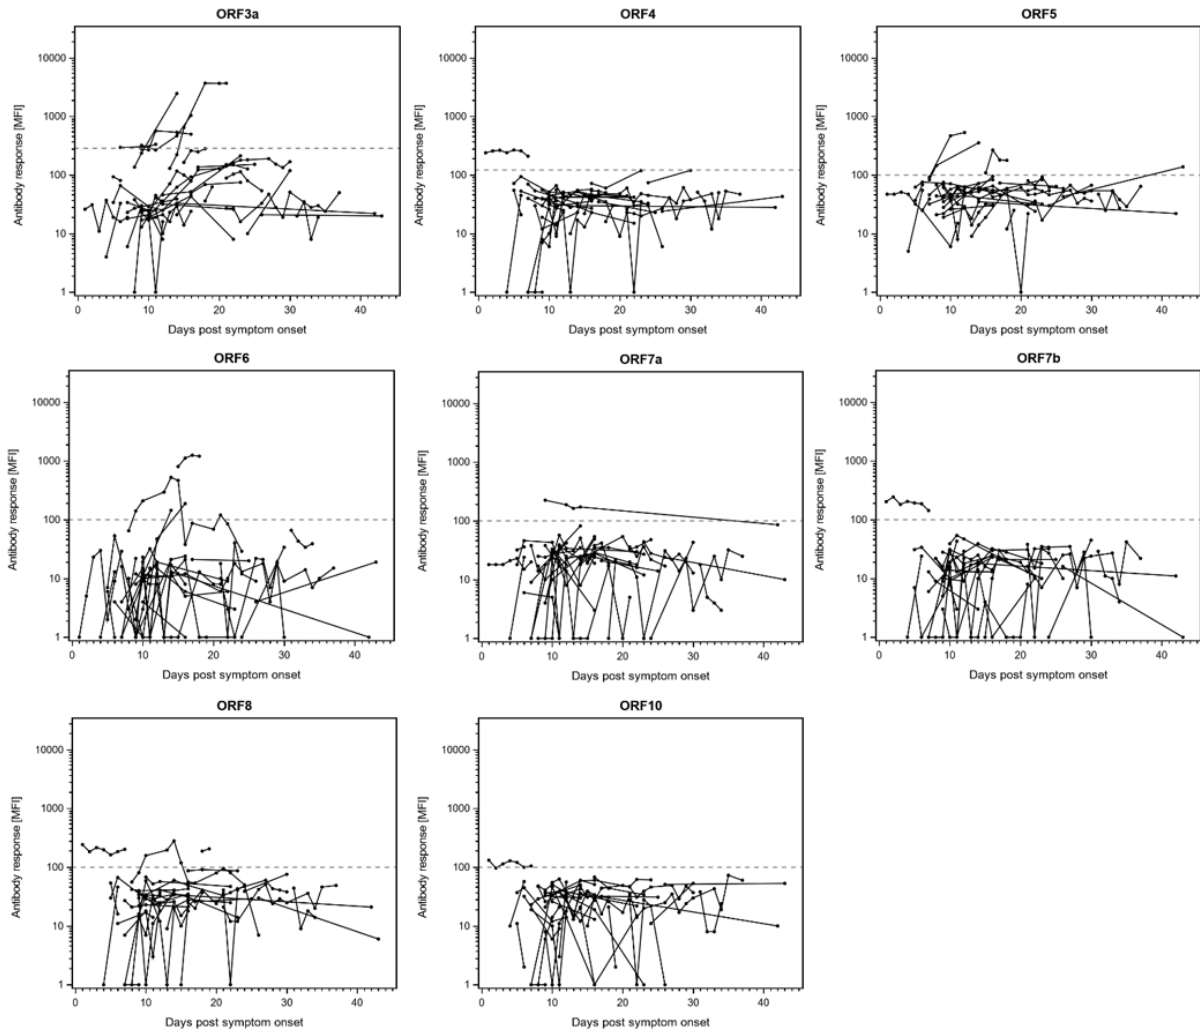

**Supplementary figure S3b: Antibody responses to SARS-CoV-2 ORF proteins in longitudinal samples of n=32 hospitalized Covid-19 patients.** The antibody response (MFI) is plotted against days post symptom onset. The dashed line indicates the antigen-specific cut-off defined as mean plus three times standard deviation in n=85 pre-pandemic controls.

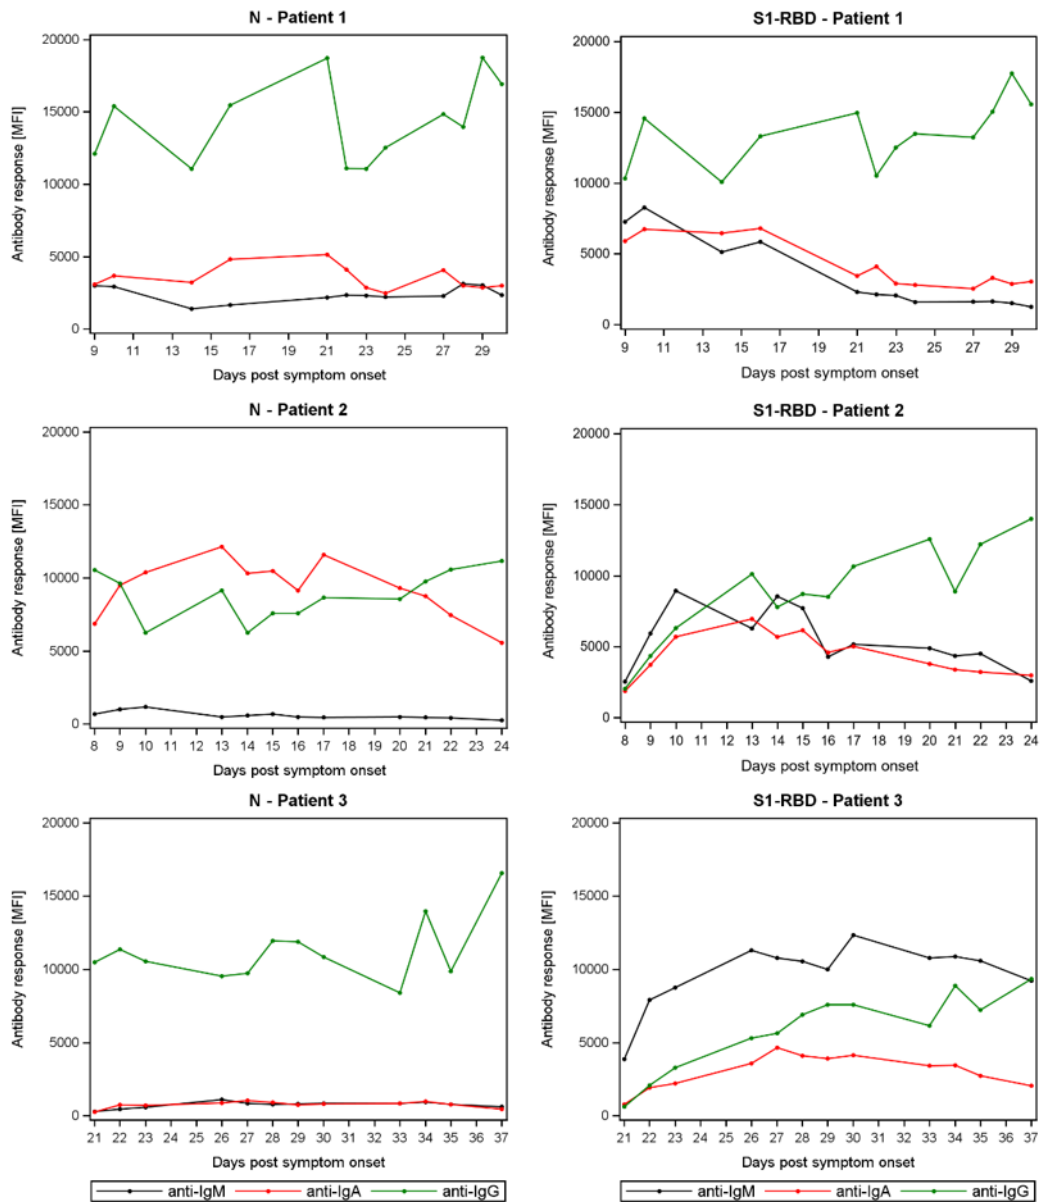

**Supplementary figure S4: Antibody response of different immunoglobulin isotypes (M, A, and G) to SARS-CoV-2 proteins N and S1-RBD in three Covid-19 patients with longitudinal samples. The IgM, IgA, and IgG antibody response (MFI) is plotted against days post symptom onset.**
